# Supplementary material
Source: MDPI journal article supplement (https://www.mdpi.com/2297-8739/10/8/449)
Supplement: s1 [file s1]

## Supplementary materials

# Analytical and Preparative Separation of Softwood Lignans by Supercritical Fluid Chromatography

Nikolay V. Ul'yanovskii<sup>1,\*</sup>, Aleksandra A. Onuchina<sup>1</sup>, Denis V. Ovchinnikov<sup>1</sup>, Anna V. Faleva<sup>1</sup>, Natalia S. Gorbova<sup>2</sup> and Dmitry S. Kosyakov<sup>1,\*</sup>

<sup>1</sup> Laboratory of Natural Product Chemistry and Bioanalytics, Core Facility Center "Arktika", Northern (Arctic) Federal University, Arkhangelsk 163002, Russia

<sup>2</sup> Federal Center for Integrated Arctic Research, Arkhangelsk 163000, Russia

\*Correspondence: n.ulyanovsky@narfu.ru (N.V.U.); d.kosyakov@narfu.ru (D.S.K.)

**Table S1.** Low-purity preparative SFC fractions of coniferous knotwood extractives.

| Tree Species | Fraction No.* | Purity, % | <i>m/z</i> [M – H] <sup>–</sup> , (Δ, ppm) | Elemental Composition                           | Assumed Compound      |
|--------------|---------------|-----------|--------------------------------------------|-------------------------------------------------|-----------------------|
| Pine         | 3             | 70        | 357.1338 (-1.3)                            | C <sub>20</sub> H <sub>22</sub> O <sub>6</sub>  | Matairesinol          |
|              |               | 30        | 255.1028 (0.5)                             | C <sub>16</sub> H <sub>16</sub> O <sub>3</sub>  | Pterostilbene         |
| Spruce       | 6             | 30        | 373.1295 (0.6)                             | C <sub>20</sub> H <sub>22</sub> O <sub>7</sub>  | 5-Hydroxymatairesinol |
|              | 7             | -         | -                                          | -                                               | Many compounds        |
|              | 8             | -         | -                                          | -                                               | Many compounds        |
| Fir          | 4             | -         | -                                          | -                                               | Many compounds        |
|              | 5             | -         | -                                          | -                                               | Many compounds        |
|              | 6             | 78        | 505.1886 (3.6)                             | C <sub>29</sub> H <sub>30</sub> O <sub>8</sub>  | Sesquilignan          |
|              | 8             | 14        | 557.2404 (2.1)                             | C <sub>30</sub> H <sub>38</sub> O <sub>10</sub> | Sesquilignan          |
|              |               | 86        | 539.2286 (-0.1)                            | C <sub>30</sub> H <sub>36</sub> O <sub>9</sub>  | Sesquilignan          |
| Larch        | 1             | 66        | 373.1290 (-0.7)                            | C <sub>20</sub> H <sub>22</sub> O <sub>7</sub>  | Nortrachelogenin      |
|              | 3             | -         | -                                          | -                                               | Many compounds        |
|              | 4             | -         | -                                          | -                                               | Many compounds        |
|              | 5             | -         | -                                          | -                                               | Many compounds        |
|              | 6             | -         | -                                          | -                                               | Many compounds        |
|              | 7             | -         | -                                          | -                                               | Many compounds        |
|              | 9             | 70        | 716.3066 (-1.0)                            | C <sub>40</sub> H <sub>48</sub> O <sub>12</sub> | Dilignan              |
|              | 11            | -         | -                                          | -                                               | Many compounds        |

\* - corresponds to the number of the fraction collection zone depicted in Figure 3.

**Table S2.** <sup>1</sup>H NMR spectra of the isolated pure compounds.

| Fraction                         | $\delta$ ppm                                                                                                                                                                                                                                                                                                                   | Identified Compound     |
|----------------------------------|--------------------------------------------------------------------------------------------------------------------------------------------------------------------------------------------------------------------------------------------------------------------------------------------------------------------------------|-------------------------|
| Pine ( <i>Pinus Sylvestris</i> ) |                                                                                                                                                                                                                                                                                                                                |                         |
| 1                                | 3.74 (s, 3H) 6.28 (s, 1H) 6.60 (s, 1H) 6.65 (s, 1H) 7.14 (m, 2H) 7.26 (br t, J=7.18 Hz, 1H) 7.37 (br t, J=7.70 Hz, 2H) 7.59 (br d, J=7.70 Hz, 2H) 9.47 (br s, 1H)                                                                                                                                                              | Pinosylvin methyl ether |
| 2                                | 3.76 (s, 6H) 6.37 (s, 1H) 6.71 (s, 2H) 6.76 (br d, J=8.25 Hz, 2H) 6.94 (br d, J=16.51 Hz, 1H) 7.15 (br d, J=15.96 Hz, 1H) 7.41 (br d, J=8.80 Hz, 2H) 9.59 (br s, 1H)                                                                                                                                                           | Pterostilbene           |
| 4                                | 2.25 - 2.31 (m, 1H) 2.35 (s, 1H) 2.59 (br dd, J=12.65, 3.30 Hz, 1H) 2.80 (br d, J=13.76 Hz, 1H) 2.97 (br d, J=13.75 Hz, 1H) 3.69 (s, 1H) 3.72 (s, 1H) 3.89 - 3.97 (m, 1H) 6.18 (s, 1H) 6.48 - 6.53 (m, 1H) 6.55 - 6.60 (m, 1H) 6.64 (br d, J=1.65 Hz, 1H) 6.64 - 6.68 (m, 1H) 6.71 - 6.74 (m, 1H) 8.72 (s, 1H) 8.81 (s, 1H)    | Nortrachelogenin        |
| 5                                | 6.16 (s, 1H) 6.44 (s, 1H) 7.04 (d, J=3.30 Hz, 2H) 7.25 (t, J=7.36 Hz, 1H) 7.36 (br t, J=7.43 Hz, 1H) 7.57 (br d, J=7.70 Hz, 1H) 9.24 (s, 1H)                                                                                                                                                                                   | Pinosylvin              |
| Spruce ( <i>Picea abies</i> )    |                                                                                                                                                                                                                                                                                                                                |                         |
| 1                                | 2.39 - 2.44 (m, 1H) 2.64 - 2.70 (m, 1H) 2.70 - 2.84 (m, 1H) 3.71 (br s, 1H) 3.71 (br s, 1H) 3.82 - 3.91 (m, 1H) 4.00 - 4.10 (m, 1H) 6.47 (br d, J=7.70 Hz, 1H) 6.56 - 6.59 (m, 1H) 6.60 (s, 1H) 6.65 (br d, J=7.70 Hz, 1H) 6.67 (br d, J=8.25 Hz, 1H) 6.73 (s, 1H) 8.75 (br s, 1H) 8.79 (br s, 1H);                            | Matairesinol            |
| 2                                | 2.78 (dd, J=13.94, 9.17 Hz, 1H) 3.10 (br dd, J=13.94, 4.77 Hz, 1H) 3.41 - 3.44 (m, 1H) 3.65 (s, 1H) 3.86 (s, 3H) 4.10 (t, J=8.44 Hz, 1H) 4.30 (q, J=8.07 Hz, 1H) 4.52 (t, J=8.44 Hz, 1H) 6.55 - 6.60 (m, overlapped, 1H) 6.65 (s, 1H) 6.77 (br d, J=8.80 Hz, 1H) 7.26 (overlapped, 1H) 7.28 (s, 1H)                            | Oxomatairesinol         |
| 3                                | 2.58 - 2.66 (m, 1H) 2.66 - 2.76 (m, 1H) 2.92 (t, J=13.90 Hz, 1H) 3.13 (br dd, J=15.96, 4.95 Hz, 2H) 3.78 (s, 3H) 3.83 (s, 3H) 3.92 (br d, J=11.00 Hz, 1H) 4.11 (t, J=9.26 Hz, 1H) 4.17 (t, J=9.26 Hz, 1H) 6.26 (s, 1H) 6.66 (br d, J=8.25 Hz, 1H) 6.70 (br s, 1H) 6.72 - 6.82 (m, overlapped 3H)                               | $\alpha$ -Conidendrin   |
| 4                                | 2.63 (m, 1H) 2.69 - 2.79 (m, overlapped 1H) 2.84 - 2.95 (m, overlapped 2H) 3.76 (s, 3H) 3.80 (s, 3H) 4.05 (t, J=8.80 Hz, 1H) 4.07 - 4.15 (m, 1H) 4.64 (d, J=5.14 Hz, 1H) 6.48 (dd, J=8.07, 1.83 Hz, 1H) 6.56 (d, J=1.83 Hz, 1H) 6.64 (d, J=8.07 Hz, 1H) 6.73 (overlapped, 1H) 6.74 (overlapped, 1H) 6.77 (d, J=1.47 Hz, 1H)    | Iso-HMR                 |
| 5                                | 2.52 - 2.63 (m, overlapped, 2H) 2.66 - 2.79 (m, overlapped, 2H) 3.76 (s, 3H) 3.78 (s, 3H) 4.16 (dd, J=9.17, 8.07 Hz, 1H) 4.29 - 4.39 (m, overlapped, 2H) 6.48 (dd, J=8.07, 1.83 Hz, 1H) 6.53 (d, J=1.83 Hz, 1H) 6.65 - 6.68 (m, overlapped, 1H) 6.66 - 6.69 (m, overlapped 1H) 6.71 (d, J=1.83 Hz, 1H) 6.74 (d, J=8.07 Hz, 1H) | 5-HMR                   |
| Fir ( <i>Abies sibirica</i> )    |                                                                                                                                                                                                                                                                                                                                |                         |
| 1                                | 2.63 (m, 1H) 2.69 - 2.79 (m, overlapped 1H) 2.84 - 2.95 (m, overlapped 2H) 3.76 (s, 3H) 3.80 (s, 3H) 4.05 (t, J=8.80 Hz, 1H) 4.07 - 4.15 (m, 1H) 4.64 (d, J=5.14 Hz, 1H) 6.48 (dd,                                                                                                                                             | Iso-HMR                 |

|                                 |                                                                                                                                                                                                                                                                                                                                                                                              |                                                  |
|---------------------------------|----------------------------------------------------------------------------------------------------------------------------------------------------------------------------------------------------------------------------------------------------------------------------------------------------------------------------------------------------------------------------------------------|--------------------------------------------------|
|                                 | J=8.07, 1.83 Hz, 1H) 6.56 (d, J=1.83 Hz, 1H) 6.64 (d, J=8.07 Hz, 1H) 6.73 (overlapped, 1H) 6.74 (overlapped, 1H) 6.77 (d, J=1.47 Hz, 1H)                                                                                                                                                                                                                                                     |                                                  |
| 2                               | 2.18 (t, J=6.88 Hz, 1H) 2.41 (dd, J=13.48, 11.28 Hz, 1H) 2.54 - 2.60 (m, 1H) 2.81 (dd, J=13.48, 4.68 Hz, 1H) 3.45 (br s, 1H) 3.55 (dd, J=7.98, 6.88 Hz, 1H) 3.62 - 3.67 (m, 1H) 3.74 (s, 3H) 3.74 (s, 3H) 3.84 - 3.88 (m, 1H) 4.58 - 4.71 (m, 2H) 6.57 (dd, J=8.25, 1.65 Hz, 1H) 6.65 - 6.71 (m, overlapped 3H) 6.74 (d, J=1.65 Hz, 1H) 6.82 (d, J=1.65 Hz, 1H) 8.68 (s, 1H) 8.81 (s, 1H)    | Lariciresinol                                    |
| 3                               | (600 MHz, DMSO-d6) $\delta$ ppm 1.82 (br t, J=5.78 Hz, 2H) 2.45 - 2.61 (m, overlapped 4H) 3.28 - 3.43 (m, 4H) 3.68 (s, 6H) 4.51 (br t, J=4.68 Hz, 2H) 6.49 (dd, J=7.70, 1.65 Hz, 2H) 6.62 (br s, 2H) 6.63 (overlapped, 2H) 8.61 (br s, 2H);                                                                                                                                                  | Secoisolariciresinol                             |
| 7                               | 1.83 (br t, J=5.78 Hz, 2H) 2.50 (m, overlapped 4H) 3.23 (m, overlapped, 2H) 3.28 - 3.43 (m, overlapped 4H) 3.53 - 3.60 (m, overlapped 2H) 3.65 - 3.76 (s, overlapped 9H) 4.17 (m, overlapped 1H) 4.71 (m, overlapped 1H) 6.49 (br d, J=7.70 Hz, 1H) 6.55 - 6.61 (m, 1H) 6.61 - 6.64 (m, 2H) 6.68 (br d, J=9.35 Hz, 2H) 6.76 (br d, J=7.70 Hz, 1H) 6.89 (br d, J=8.25 Hz, 1H) 6.98 (br s, 1H) | Secoisolariciresinol-sesquilignan                |
| 9                               | 1.88 (br t, J=5.78 Hz, 4H) 2.53 - 2.63 (m, 4H) 3.26 - 3.46 (overlapped 8H) 3.67 (s, 6H) 3.74 (s, 6H) 4.52 (br t, J=4.68 Hz, 4H) 6.53 (br d, J=7.70 Hz, 2H) 6.54 - 6.57 (overlapped 2H) 6.62 (overlapped 4H) 6.66 (br s, 2H)                                                                                                                                                                  | Dilignan,<br>disecoisolariciresinol, 5-5<br>bond |
| Larch ( <i>Larix sibirica</i> ) |                                                                                                                                                                                                                                                                                                                                                                                              |                                                  |
| 2                               | 1.82 (br t, J=5.78 Hz, 2H) 2.45 - 2.61 (m, overlapped 4H) 3.28 - 3.43 (m, 4H) 3.68 (s, 6H) 4.51 (br t, J=4.68 Hz, 2H) 6.49 (dd, J=7.70, 1.65 Hz, 2H) 6.62 (br s, 2H) 6.63 (overlapped, 2H) 8.61 (br s, 2H)                                                                                                                                                                                   | Secoisolariciresinol                             |
| 8                               | 1.83 (br t, J=5.78 Hz, 2H) 2.50 (m, overlapped 4H) 3.23 (m, overlapped, 2H) 3.28 - 3.43 (m, overlapped 4H) 3.53 - 3.60 (m, overlapped 2H) 3.65 - 3.76 (s, overlapped 9H) 4.17 (m, overlapped 1H) 4.71 (m, overlapped 1H) 6.49 (br d, J=7.70 Hz, 1H) 6.55 - 6.61 (m, 1H) 6.61 - 6.64 (m, 2H) 6.68 (br d, J=9.35 Hz, 2H) 6.76 (br d, J=7.70 Hz, 1H) 6.89 (br d, J=8.25 Hz, 1H) 6.98 (br s, 1H) | Secoisolariciresinol-sesquilignan                |
| 10                              | 4.48 (br dd, J=11.00, 5.50 Hz, 1H) 4.96 (br d, J=11.00 Hz, 1H) 5.72 (br d, J=5.50 Hz, 1H) 5.83 (s, 1H) 5.87 (s, 1H) 6.74 (m, overlapped 2H) 6.87 (s, 1H)                                                                                                                                                                                                                                     | Taxifolin                                        |

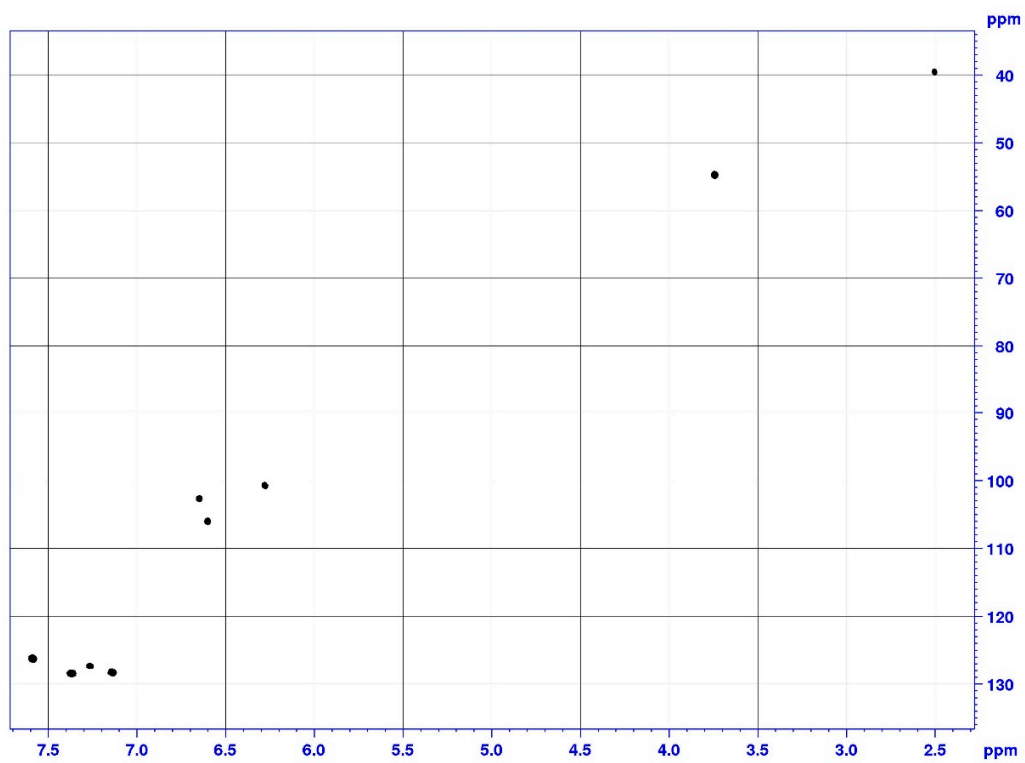

**Figure S1.**  $^1\text{H}$ - $^{13}\text{C}$  HSQC NMR spectrum of Fraction 1 isolated from pine (*Pinus Sylvestris*) extract.

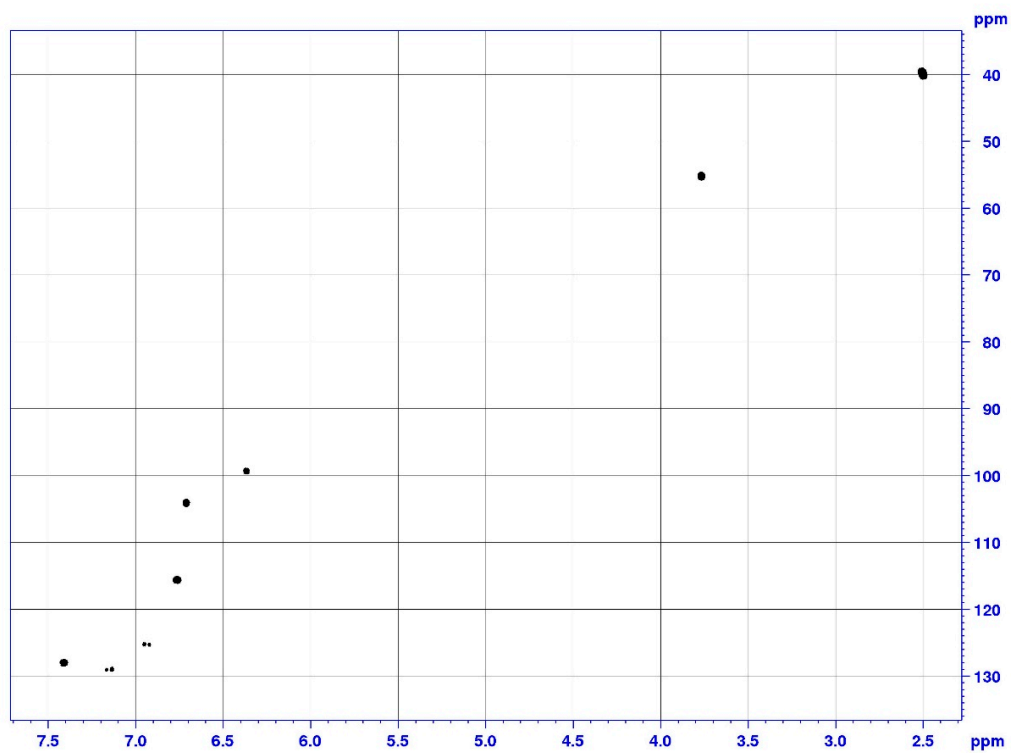

**Figure S2.**  $^1\text{H}$ - $^{13}\text{C}$  HSQC NMR spectrum of Fraction 2 isolated from pine (*Pinus Sylvestris*) extract.

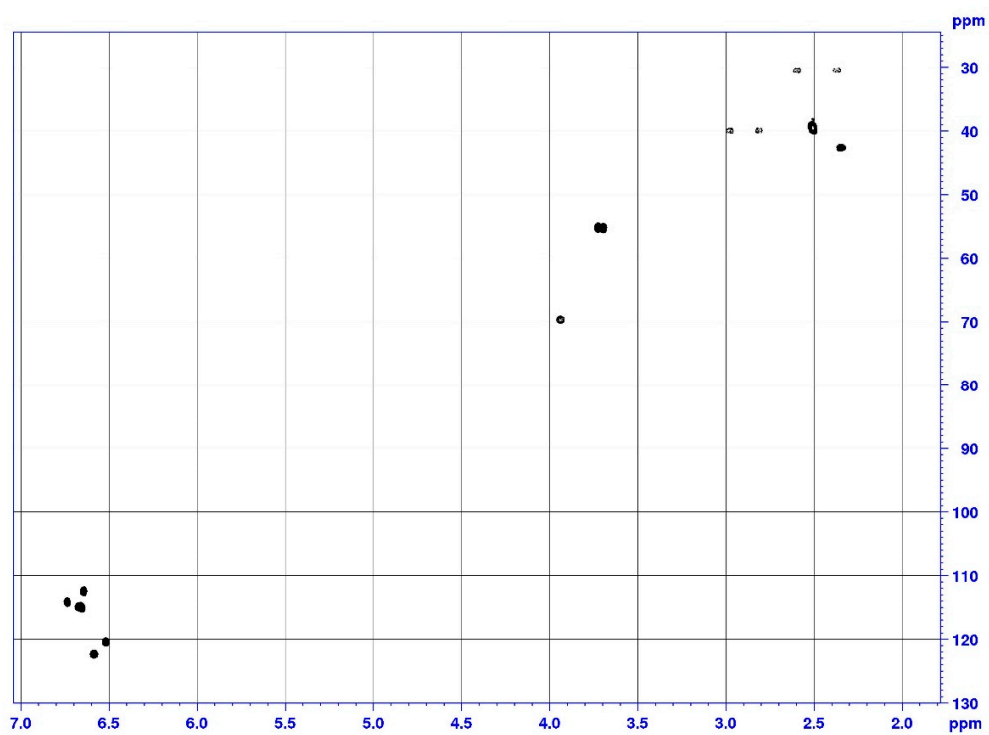

**Figure S3.**  $^1\text{H}$ - $^{13}\text{C}$  HSQC NMR spectrum of Fraction 4 isolated from pine (*Pinus Sylvestris*) extract.

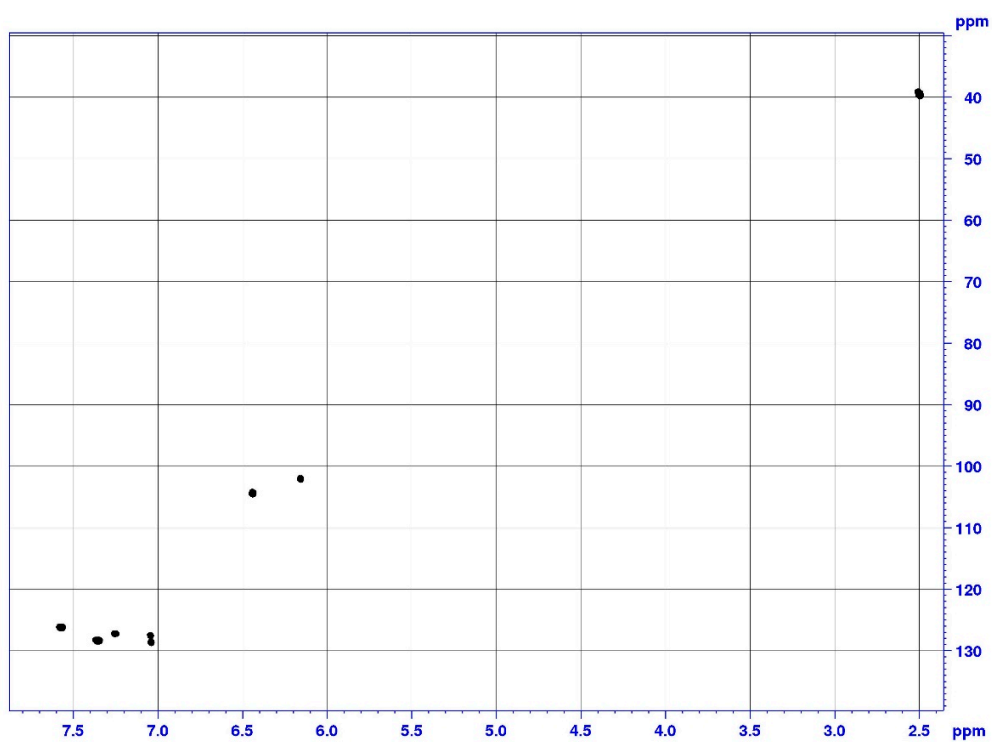

**Figure S4.**  $^1\text{H}$ - $^{13}\text{C}$  HSQC NMR spectrum of Fraction 5 isolated from pine (*Pinus Sylvestris*) extract.

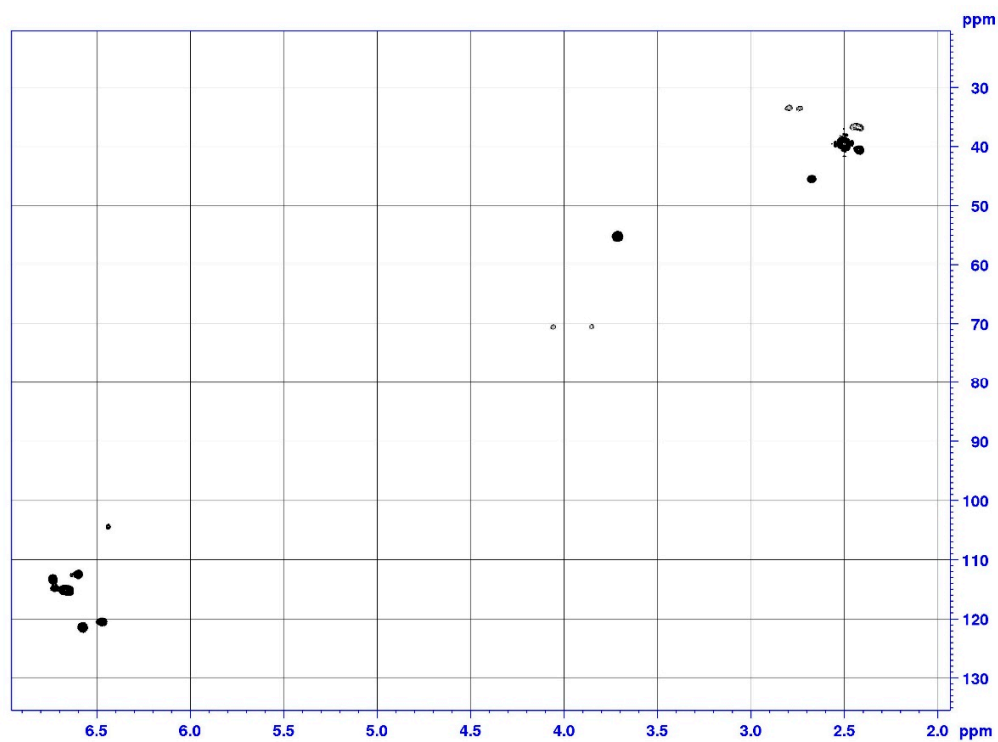

Figure S5.  $^1\text{H}$ - $^{13}\text{C}$  HSQC NMR spectrum of Fraction 1 isolated from spruce (*Picea abies*) extract.

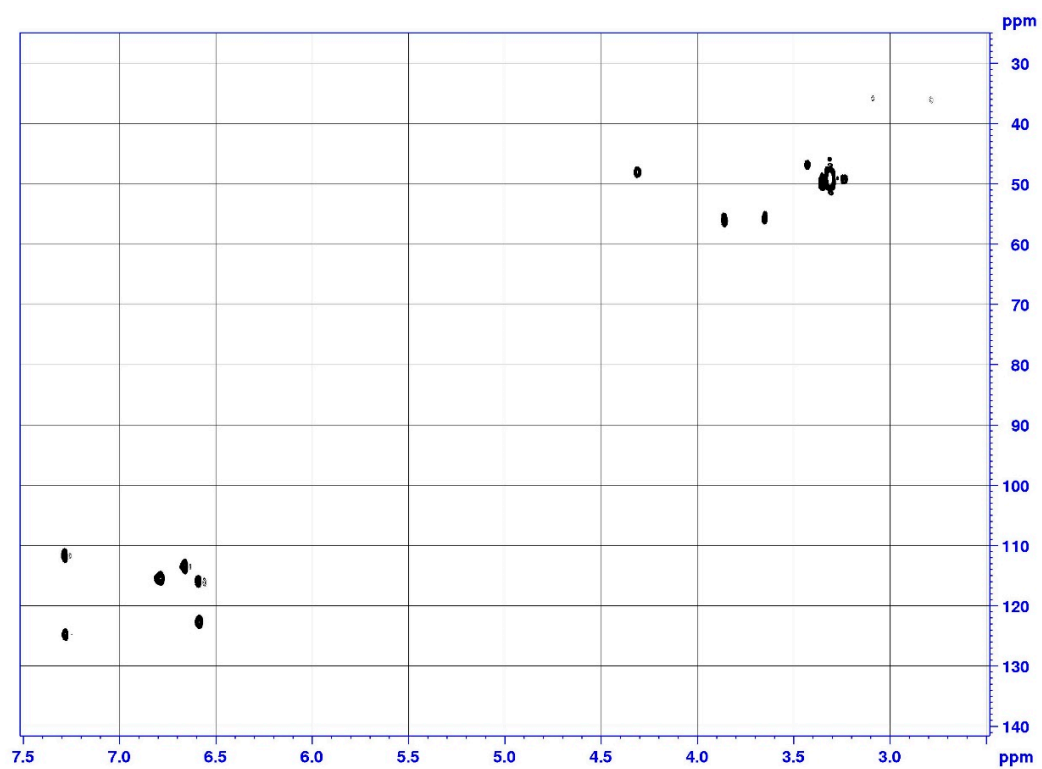

Figure S6.  $^1\text{H}$ - $^{13}\text{C}$  HSQC NMR spectrum of Fraction 2 isolated from spruce (*Picea abies*) extract.

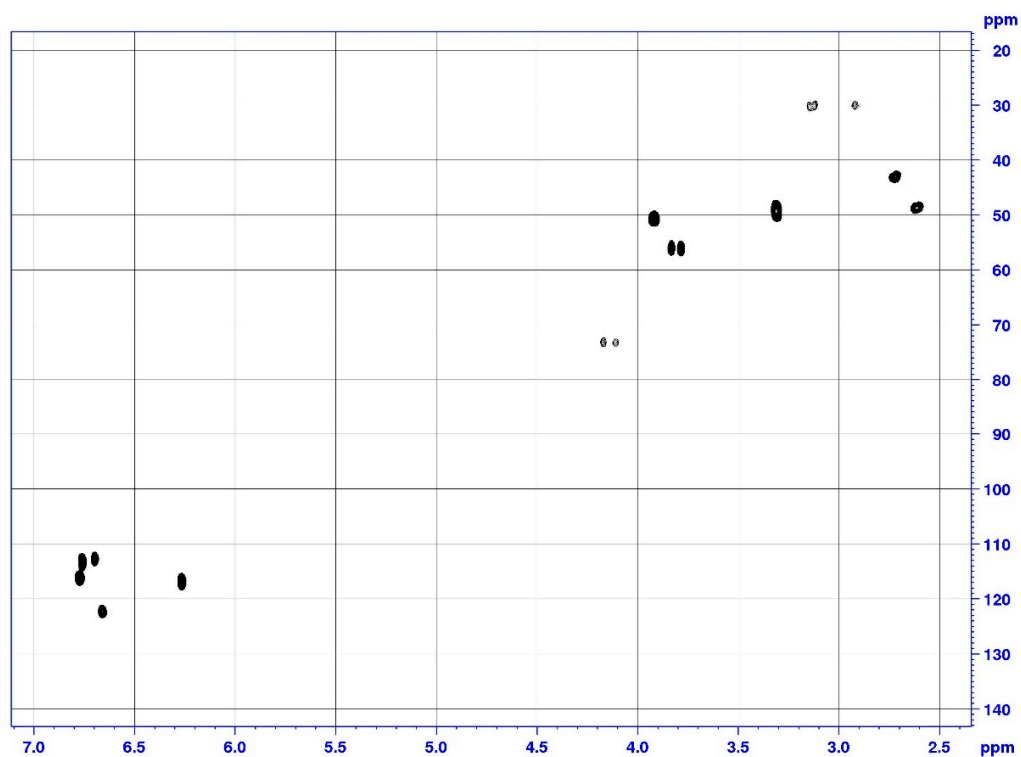

Figure S7.  $^1\text{H}$ - $^{13}\text{C}$  HSQC NMR spectrum of Fraction 3 isolated from spruce (*Picea abies*) extract.

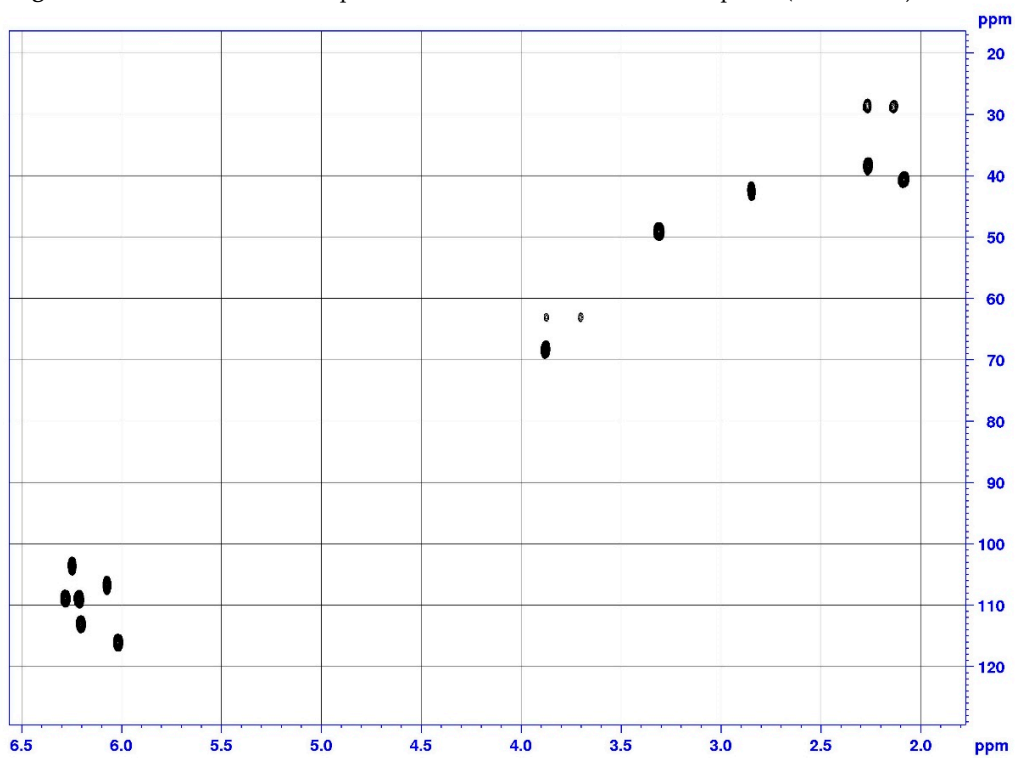

Figure S8.  $^1\text{H}$ - $^{13}\text{C}$  HSQC NMR spectrum of Fraction 4 isolated from spruce (*Picea abies*) extract.

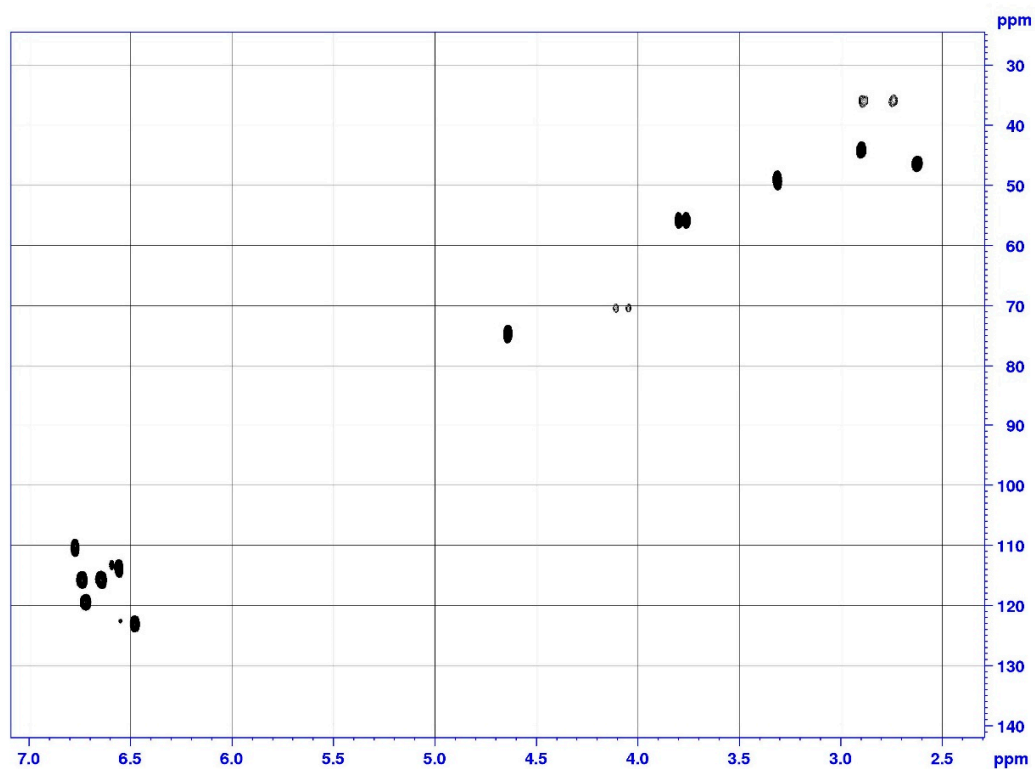

**Figure S9.**  $^1\text{H}$ - $^{13}\text{C}$  HSQC NMR spectrum of Fraction 5 isolated from spruce (*Picea abies*) extract.

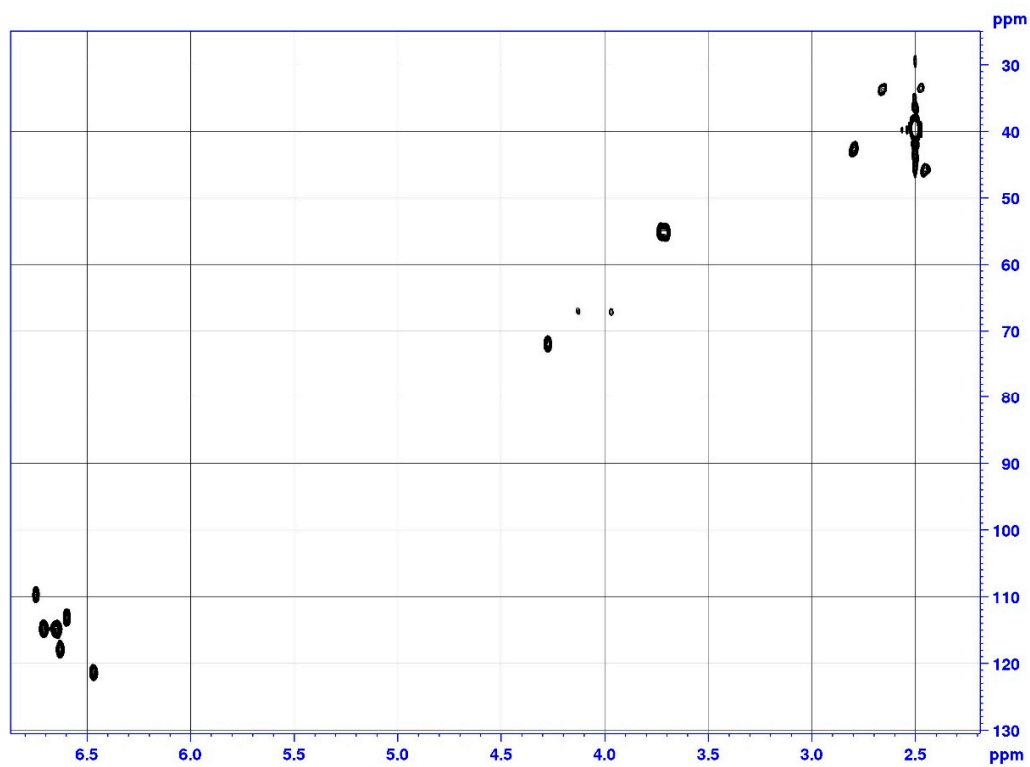

**Figure S10.**  $^1\text{H}$ - $^{13}\text{C}$  HSQC NMR spectrum of Fraction 1 isolated from fir (*Abies sibirica*) extract.



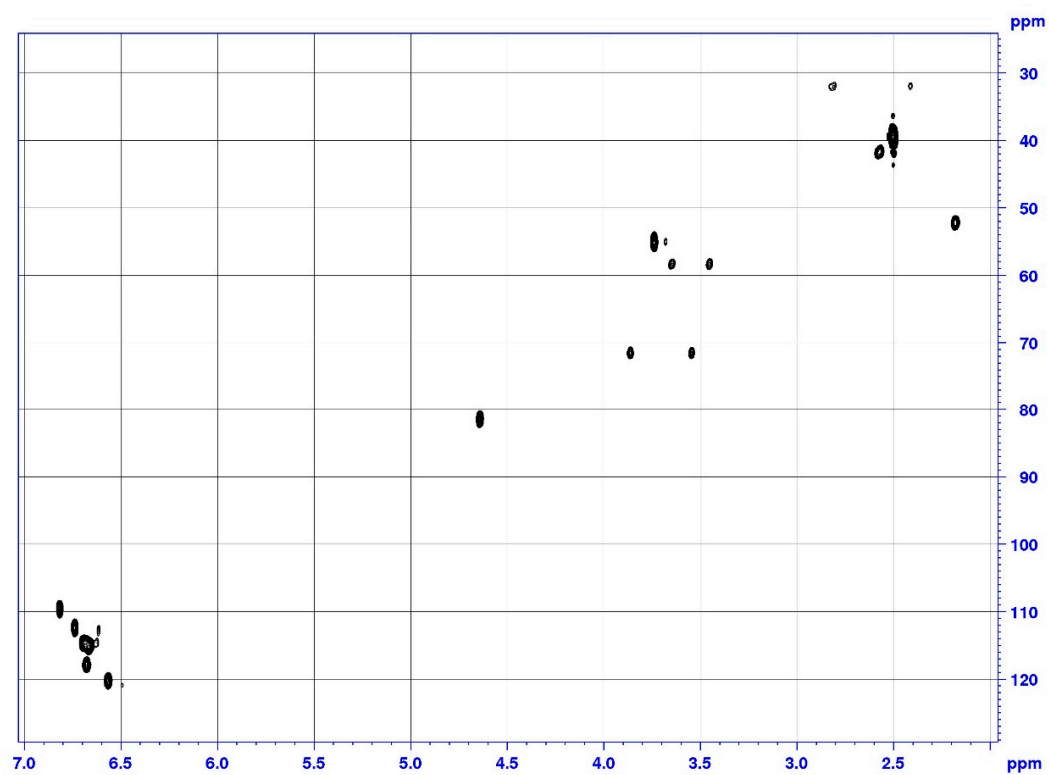

Figure S11.  $^1\text{H}$ - $^{13}\text{C}$  HSQC NMR spectrum of Fraction 2 isolated from fir (*Abies sibirica*) extract.

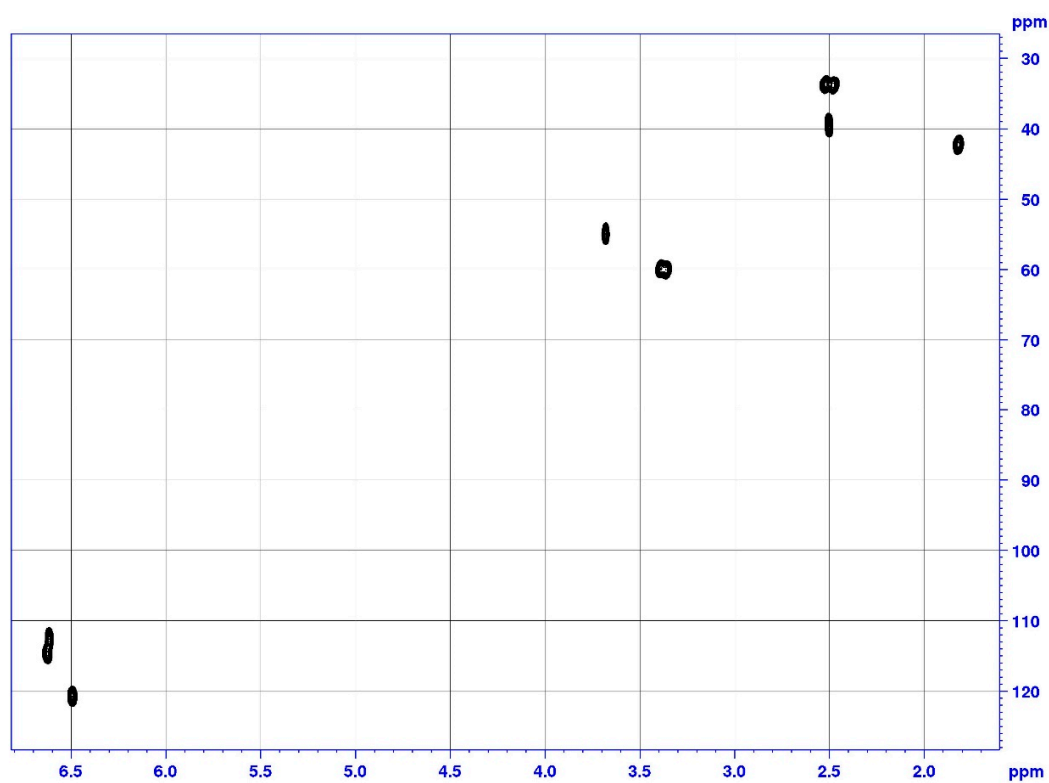

Figure S12.  $^1\text{H}$ - $^{13}\text{C}$  HSQC NMR spectrum of Fraction 3 isolated from fir (*Abies sibirica*) extract.

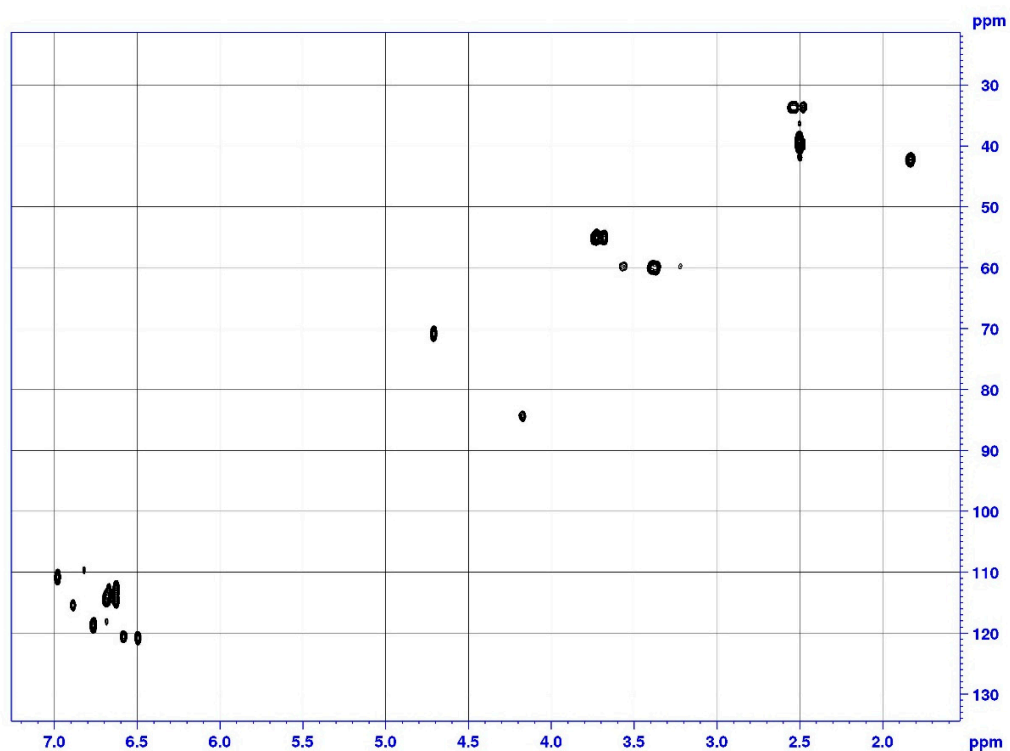

Figure S13.  $^1\text{H}$ - $^{13}\text{C}$  HSQC NMR spectrum of Fraction 7 isolated from fir (*Abies sibirica*) extract.

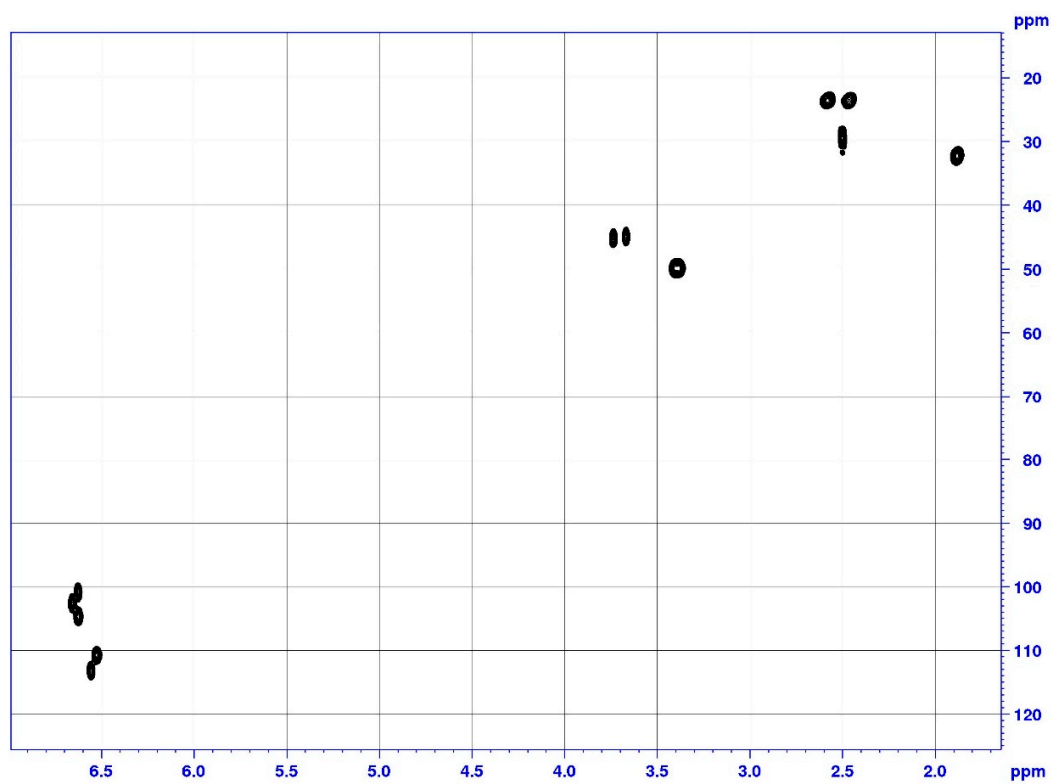

Figure S14.  $^1\text{H}$ - $^{13}\text{C}$  HSQC NMR spectrum of Fraction 9 isolated from fir (*Abies sibirica*) extract.

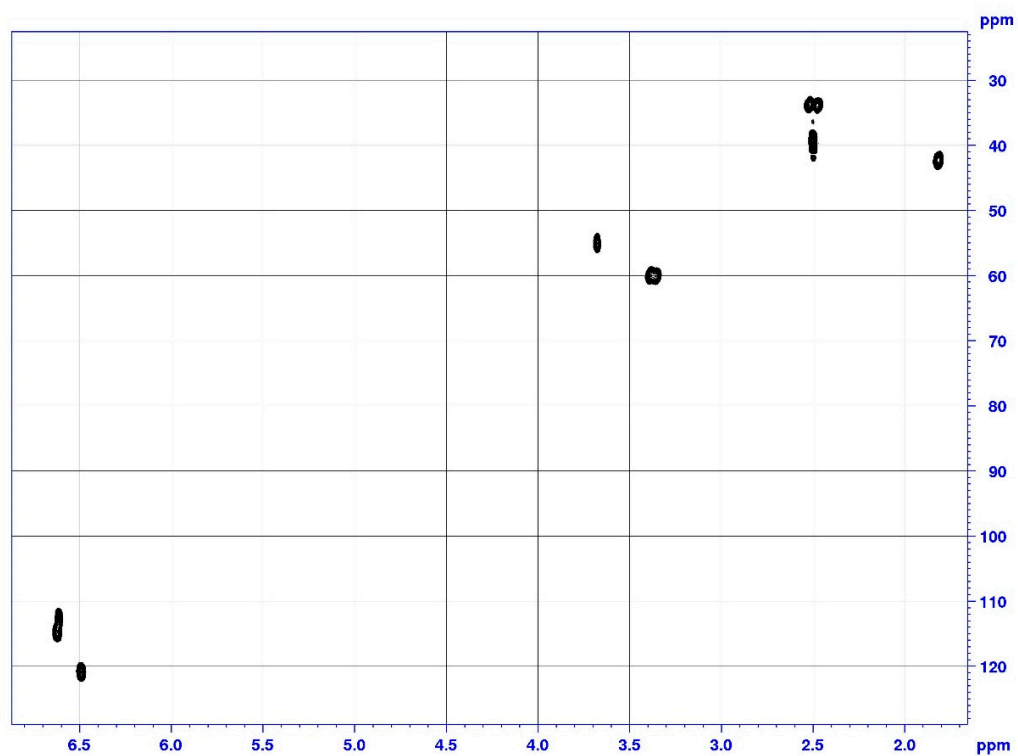

**Figure S15.**  $^1\text{H}$ - $^{13}\text{C}$  HSQC NMR spectrum of Fraction 2 isolated from larch (*Larix sibirica*) extract.

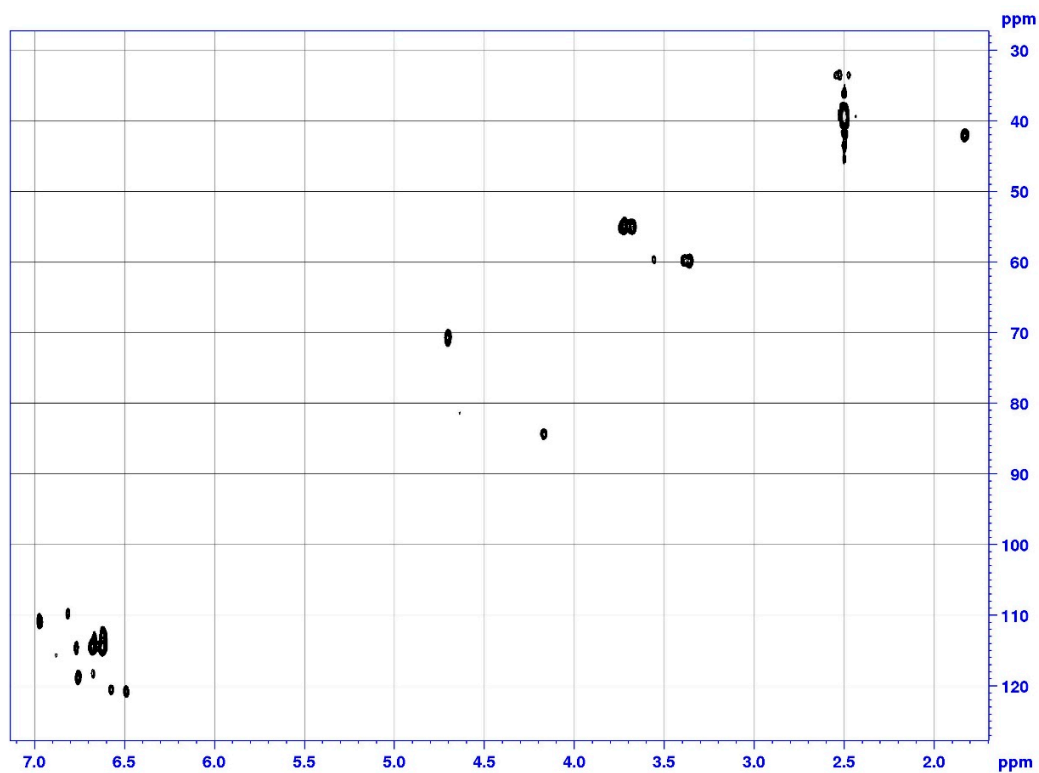

**Figure S16.**  $^1\text{H}$ - $^{13}\text{C}$  HSQC NMR spectrum of Fraction 8 isolated from larch (*Larix sibirica*) extract.

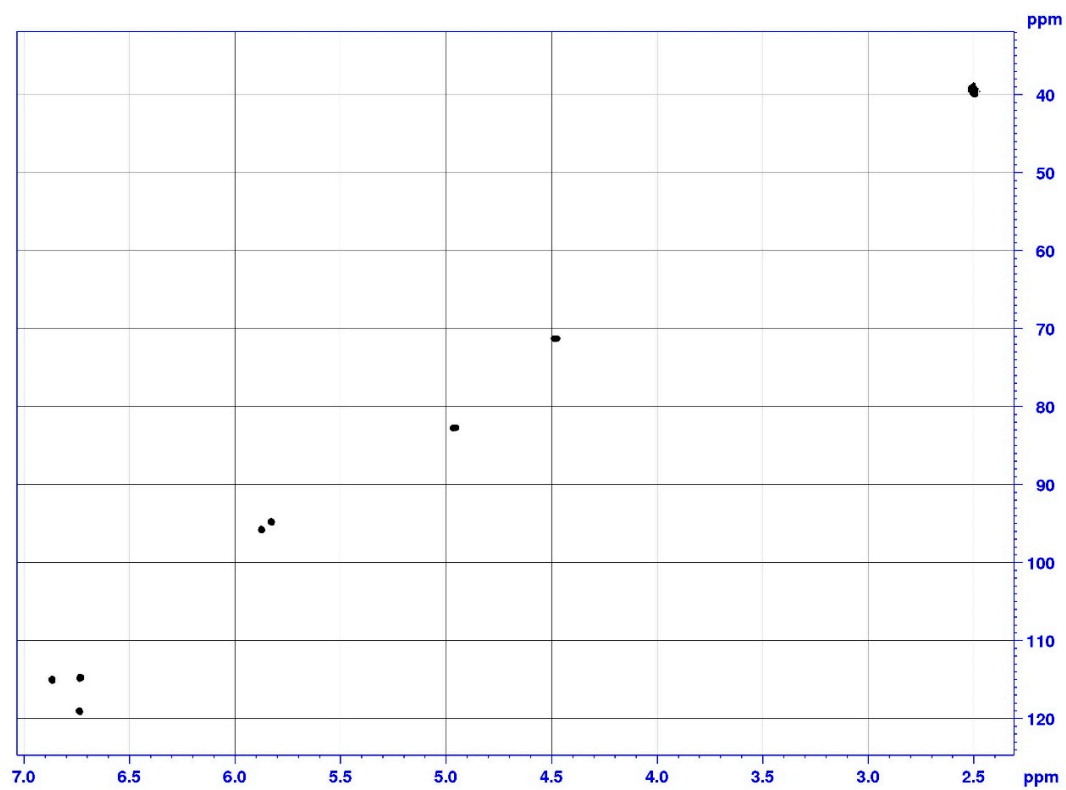

**Figure S17.**  $^1\text{H}$ - $^{13}\text{C}$  HSQC NMR spectrum of Fraction 10 isolated from larch (*Larix sibirica*) extract.
